# Supplementary material
Source: Springer Nature journal article supplement (https://www.springermedizin.de/resource/supplementary/12889_2010_2451_MOESM3_ESM.pdf/9485902)

**(a) ART clients versus FP clients**

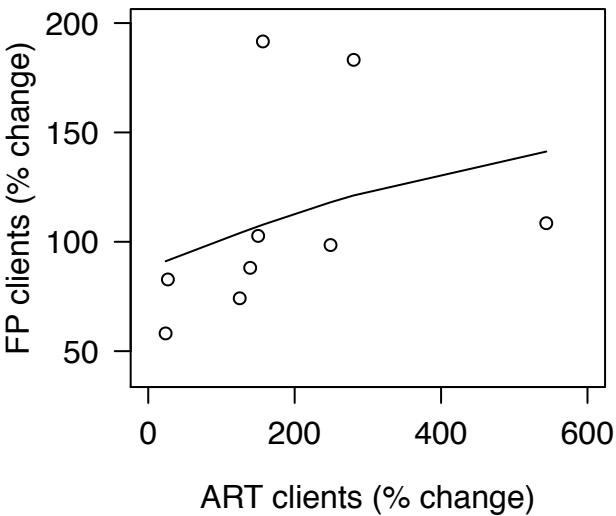

**(b) PMTCT clients versus ANC clients**

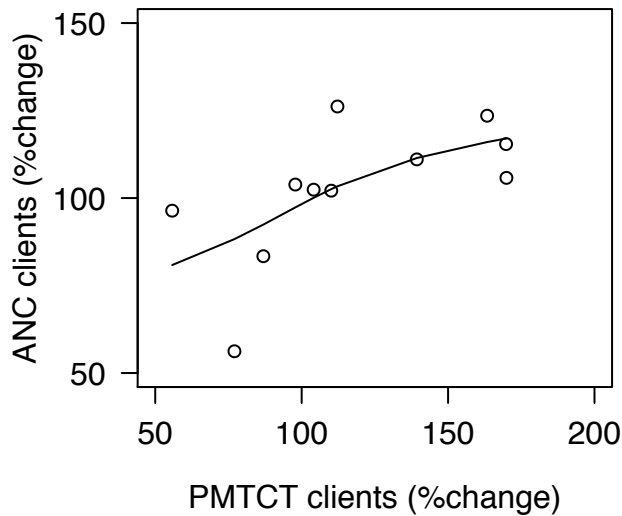

**(c) PMTCT clients versus FP clients**

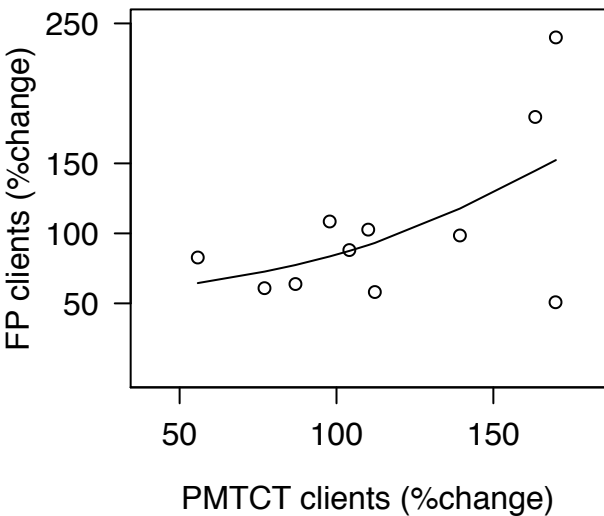

**(d) VCT clients versus FP clients**

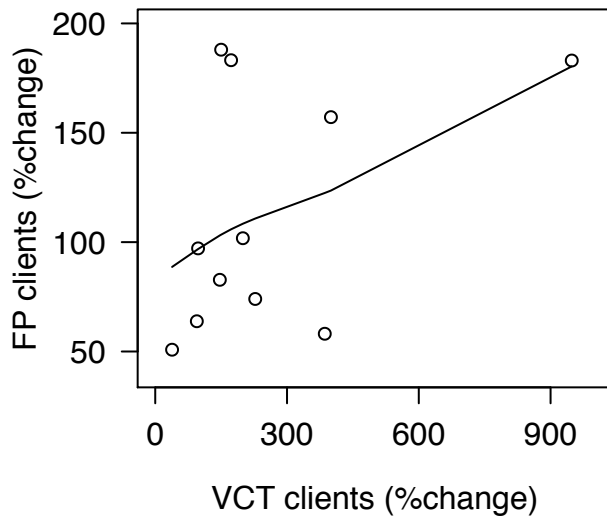

Supplement: MOESM3 [file 9485902]
